# Supplementary material for: GPR64, Screened from Ewing Sarcoma Cells, Is a Potential Target for Antibody-Based Therapy for Various Sarcomas
Source: MDPI journal article supplement (doi:10.3390/cancers14030814), 2022-02-05

# Cancers

Koichi Nakamura

Figure S1 : Uncropped western blot figure of Figure 4

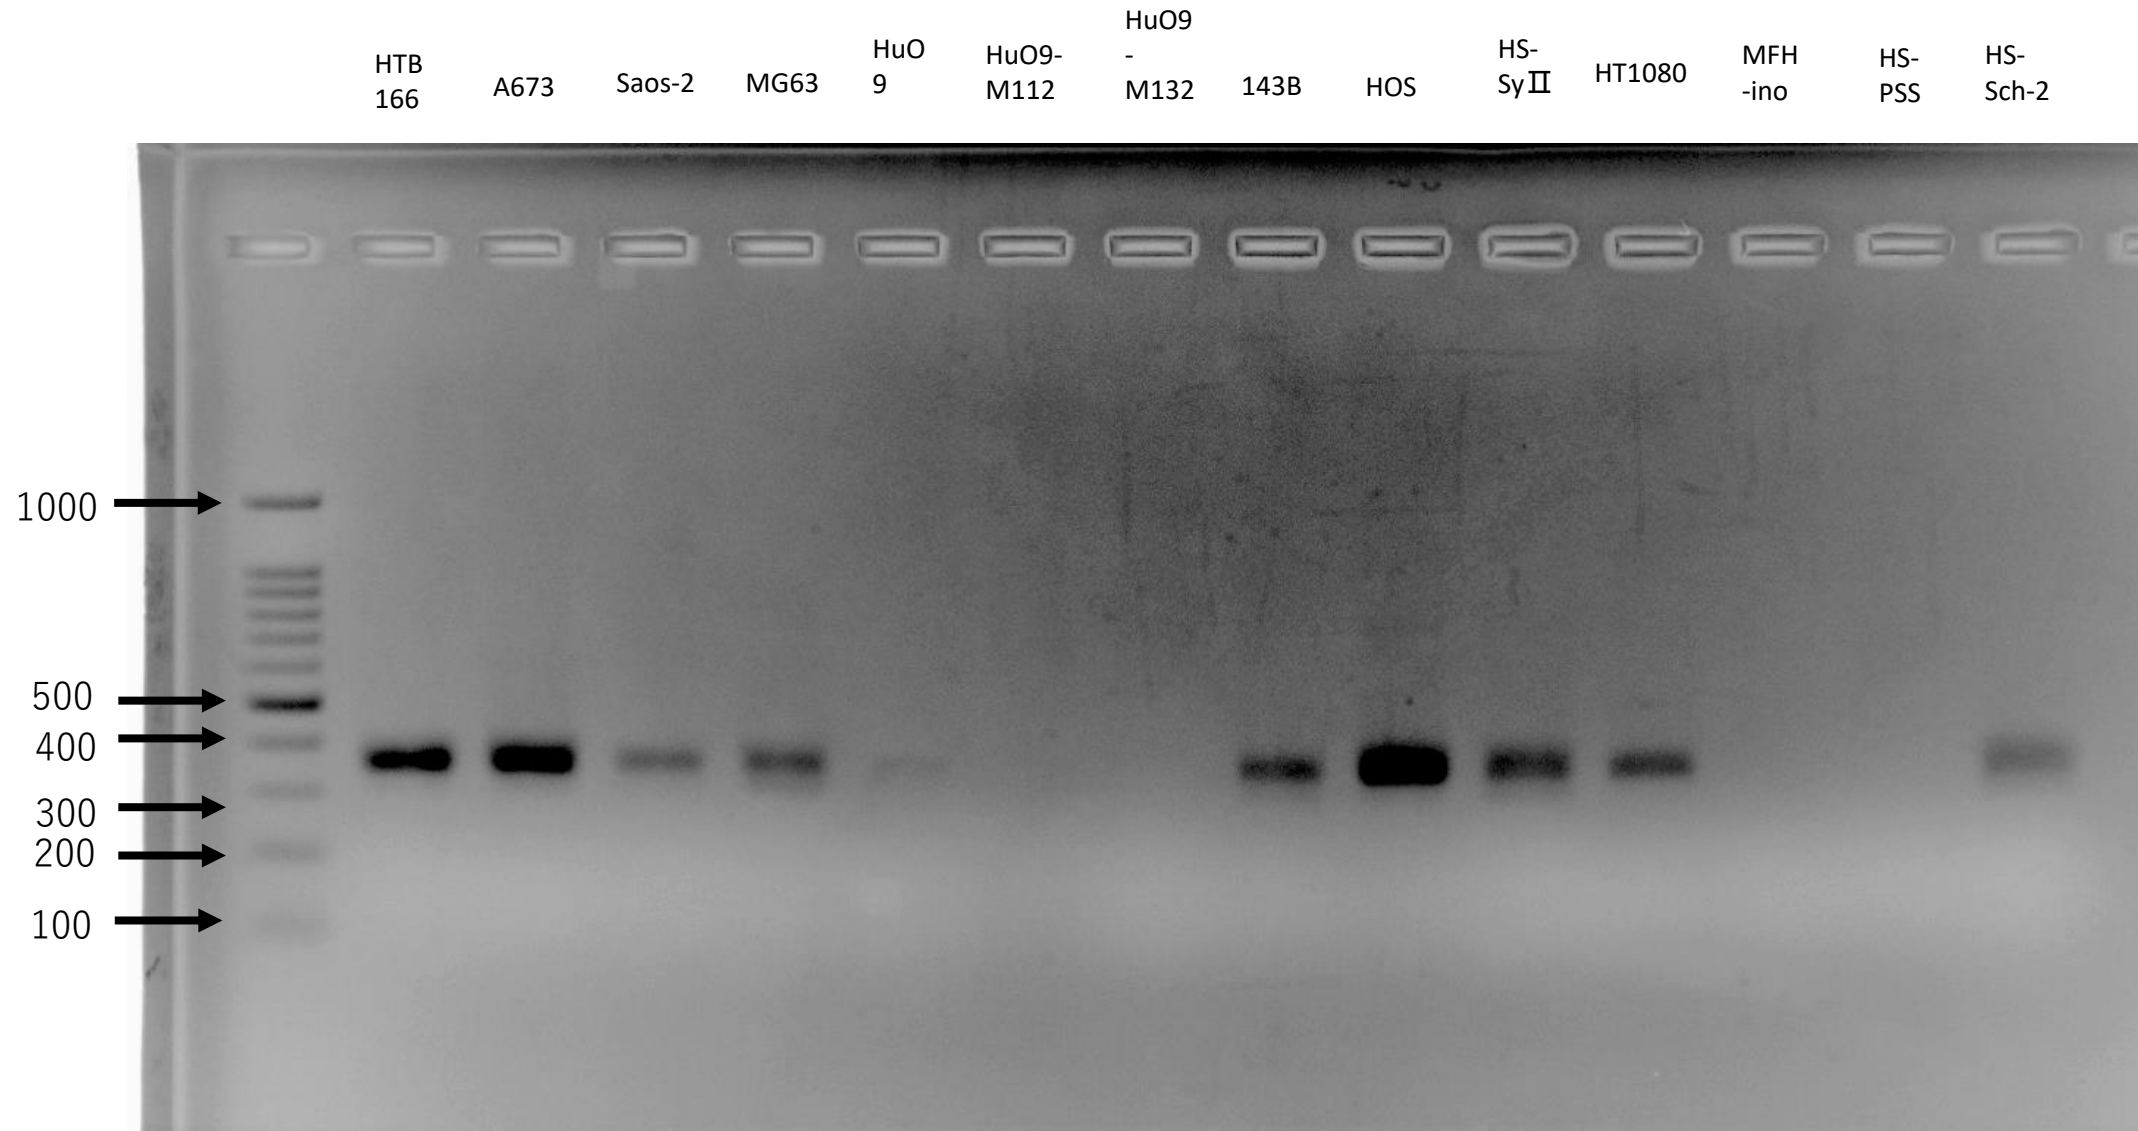

Figure S1 : Uncropped western blot figure of Figure 4

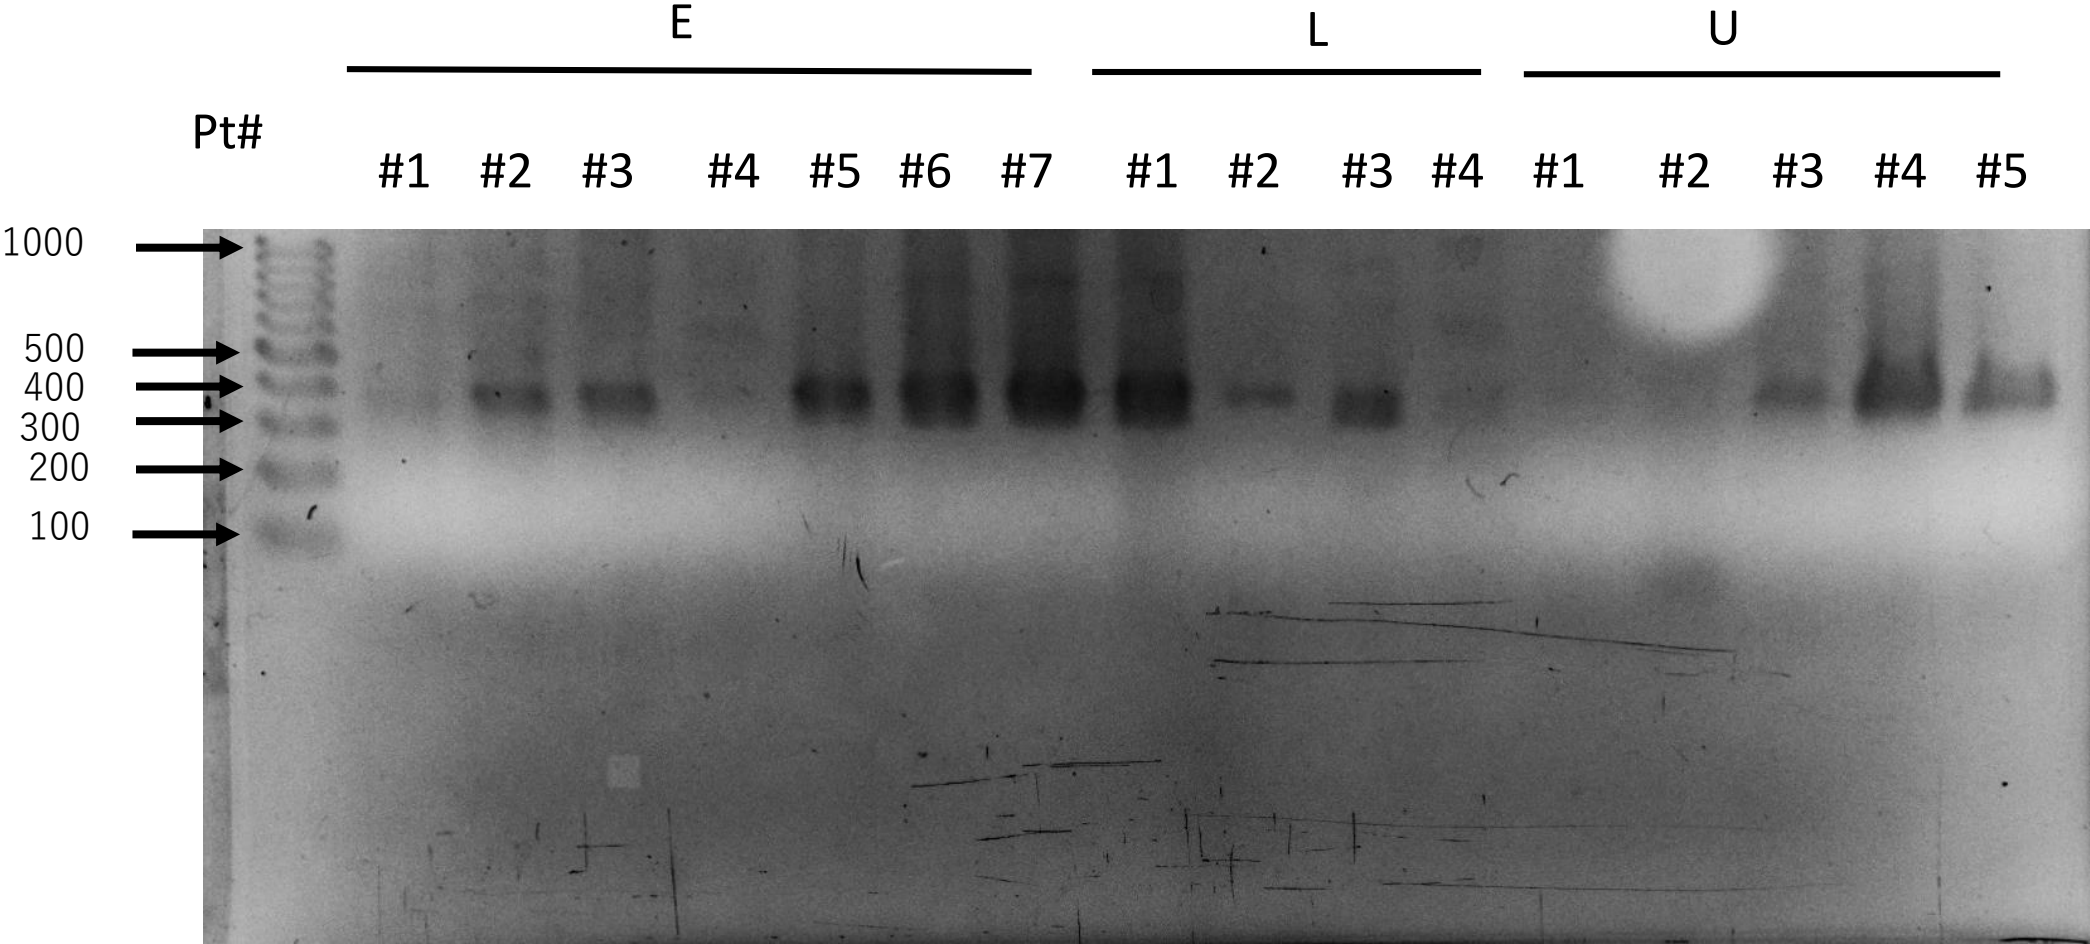

Figure S1 : Uncropped western blot figure of Figure 4

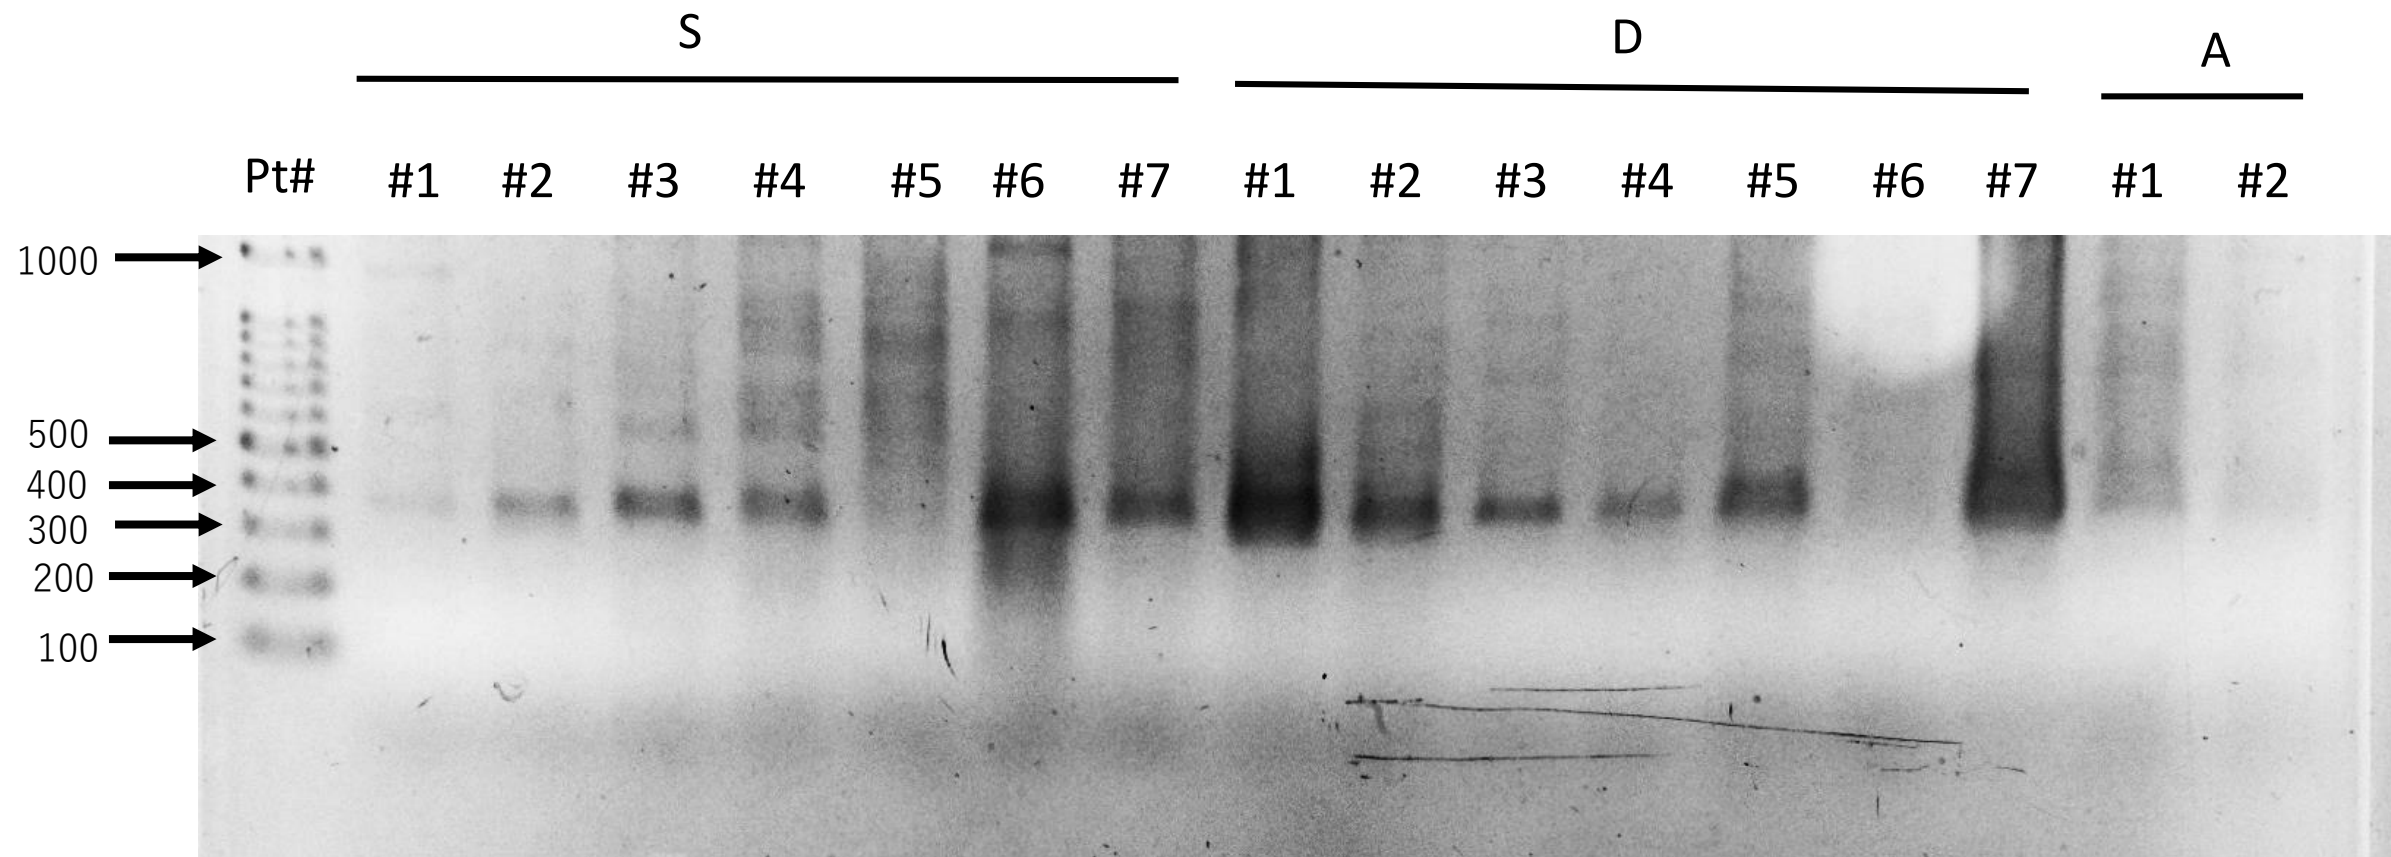

Figure S2 : Uncropped western blot figure of  
Figure 5

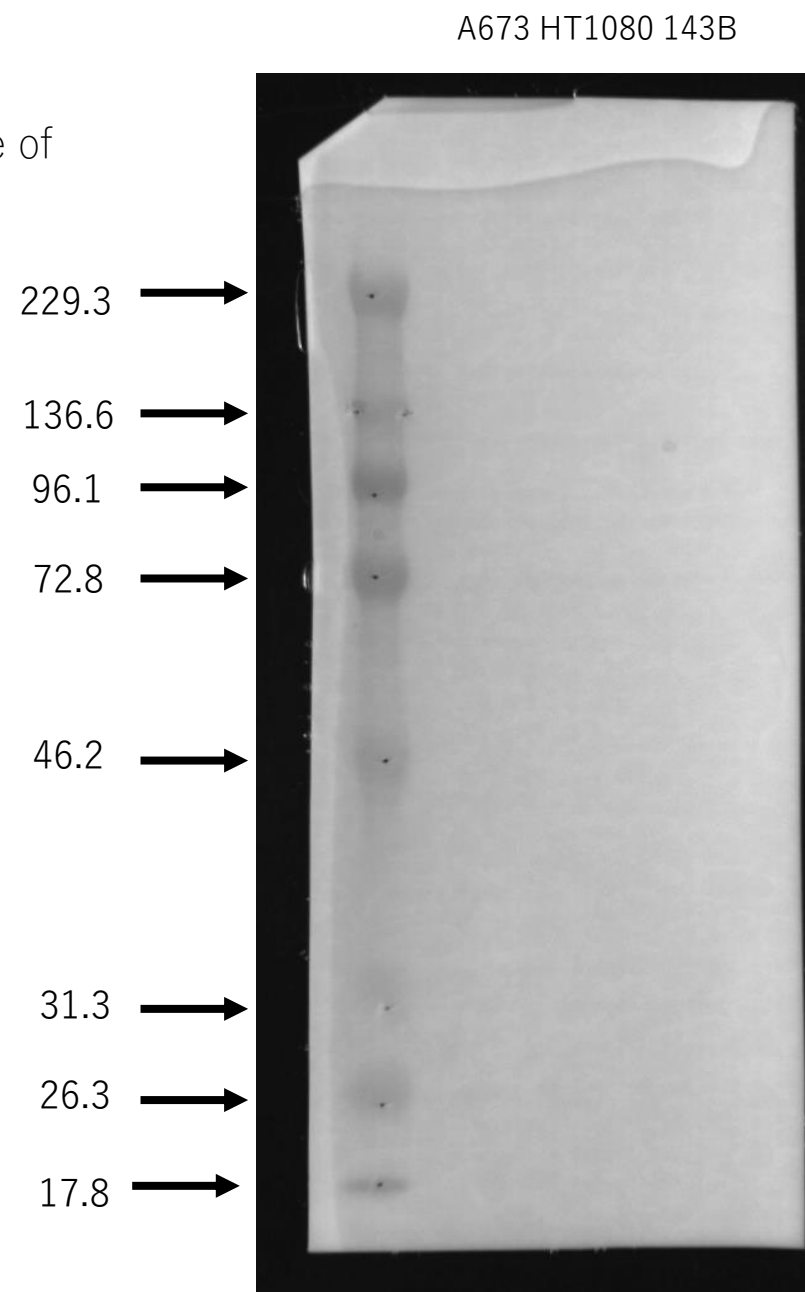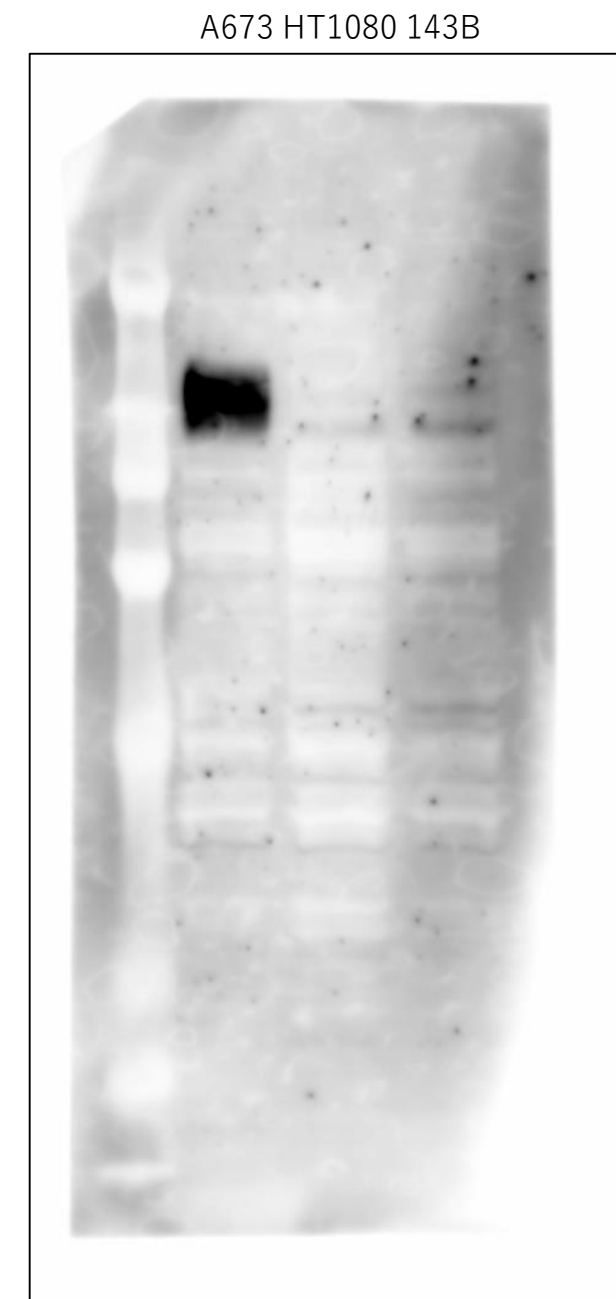

Figure S2 : Uncropped western blot figure of Figure 5

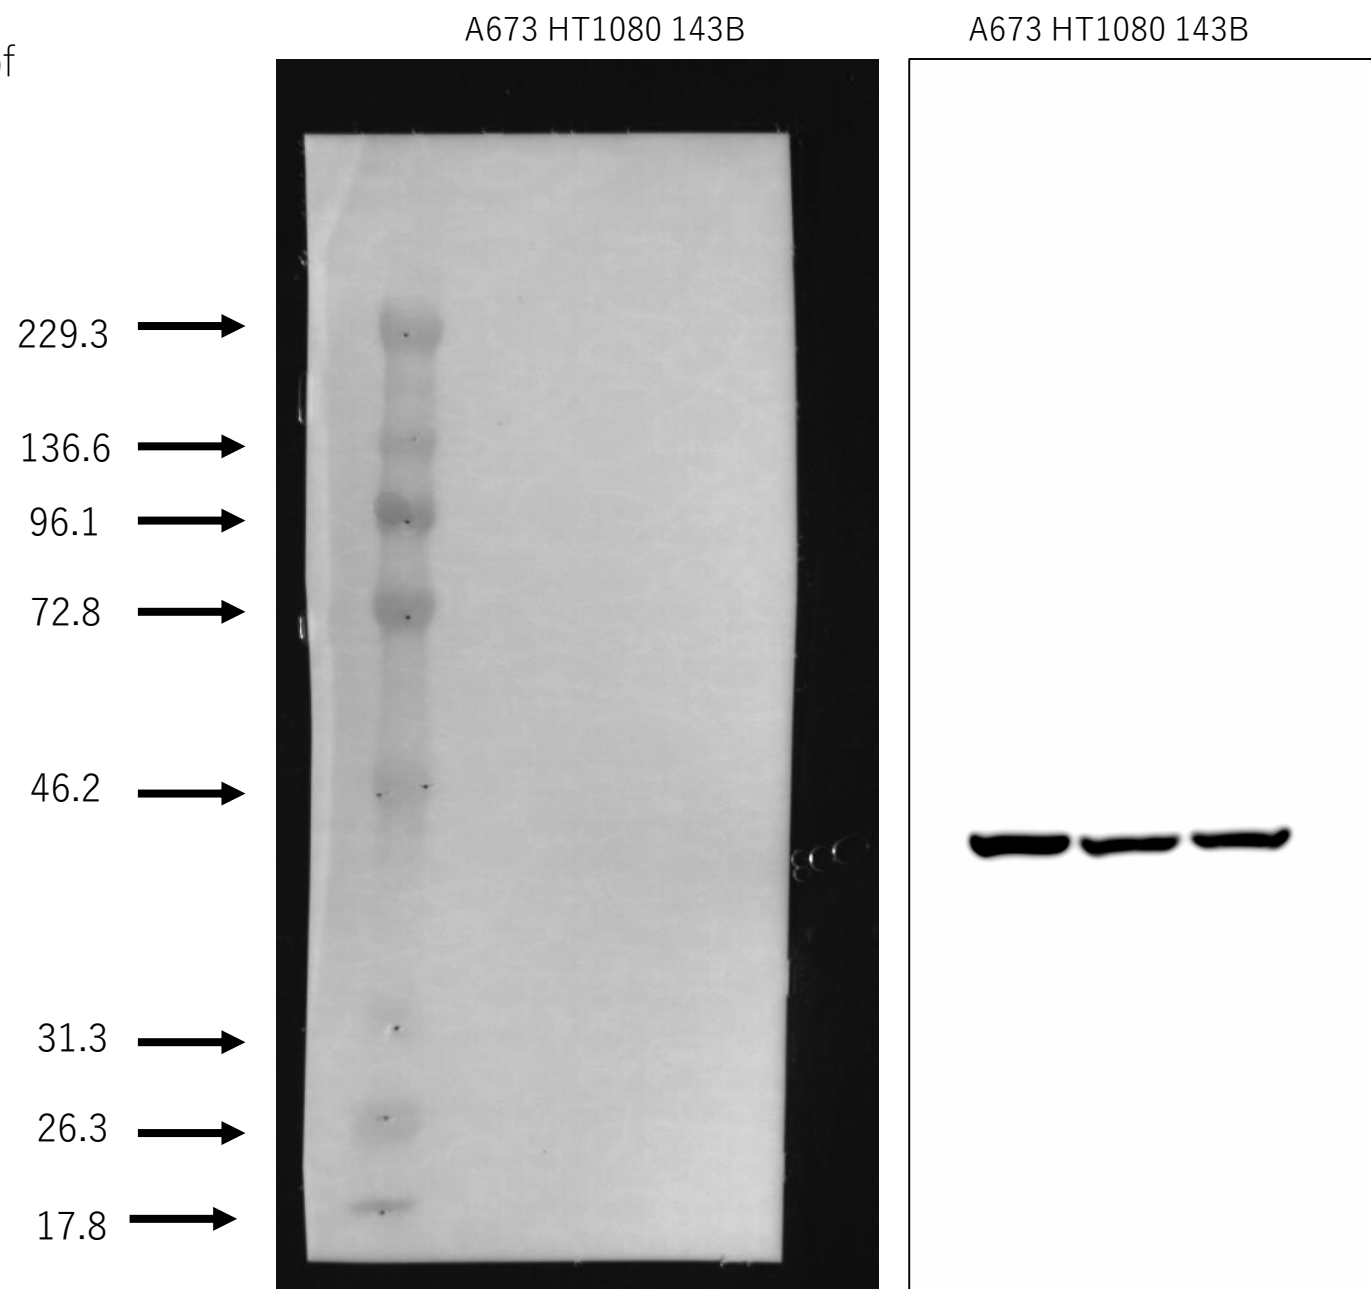

Supplement: s1 [file s1]
